# Supplementary material for: A self-powered p-CuBr/n-Si heterojunction photodetector based on vacuum thermally evaporated high-quality CuBr films
Source: Royal Society of Chemistry journal article supplement (doi:10.1039/d3tc03516f), 2023-12-01
Supplement: d3tc03516f1.pdf [file d3tc03516f1.pdf]

## Supplementary Material

### Self-powered p-CuBr/n-Si Heterojunction Photodetector Based on Vacuum Thermally Evaporated High-quality CuBr Films

Bin Xia<sup>a</sup>, Lichun Zhang<sup>a,b\*</sup>, Dan Tian<sup>a</sup>, Shunli He<sup>a</sup>, Ning Cao<sup>a</sup>, Guanying Xie<sup>b</sup>, Dengying Zhang<sup>a</sup>,  
Xinbo Chu<sup>b\*</sup>, Fengzhou Zhao<sup>a\*</sup>

<sup>a</sup> *School of Physics and Optoelectronic Engineering, Ludong University, Yantai, 264025, China*

<sup>b</sup> *School of integrated circuits, Ludong University, Yantai, 264025, China*

---

\* Corresponding author.

*Email-address: phyzlc@163.com*

*Email-address: chuxinbo007@163.com*

*Email-address: fzhao@ustc.edu*

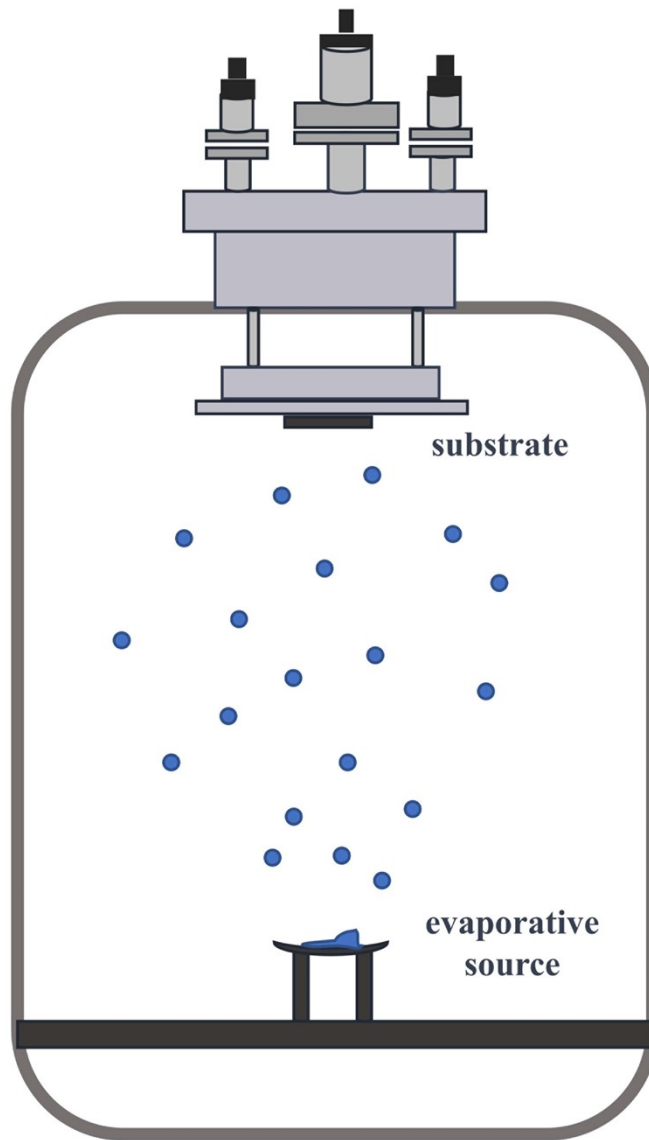

**Fig. S1** Schematic Diagram of Vacuum Thermal Evaporation.

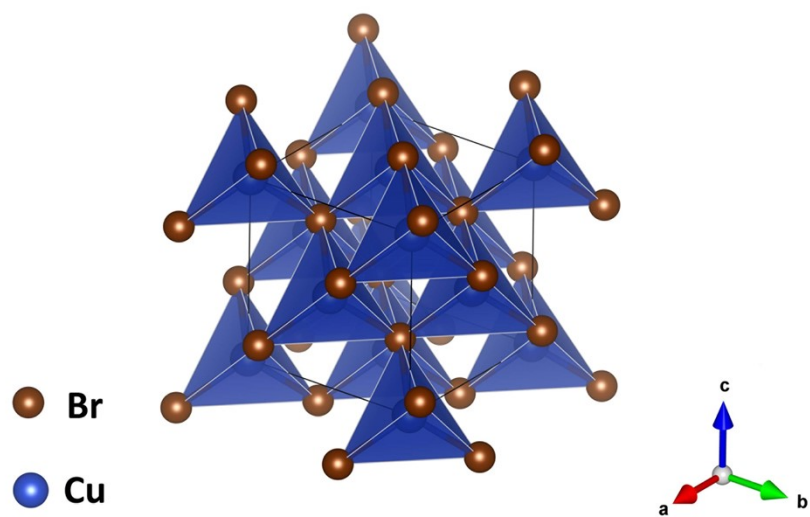

Fig. S2 Schematic diagram of CuBr crystal structure.

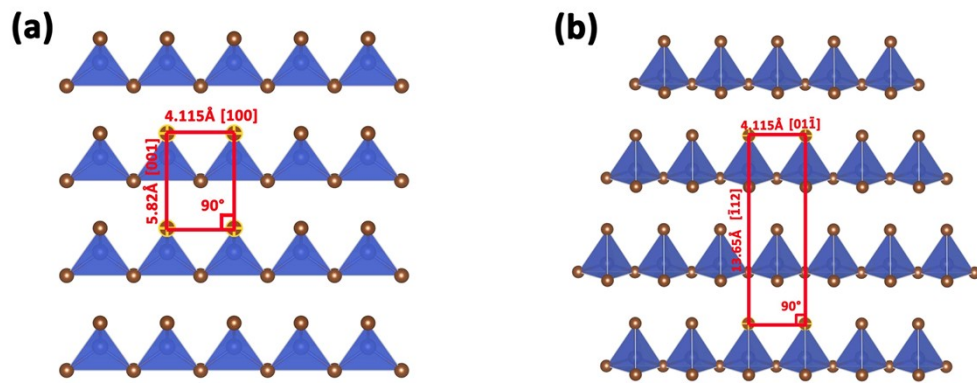

Fig. S3 (a)CuBr (220) crystal plane, (b) CuBr(311) crystal plane.

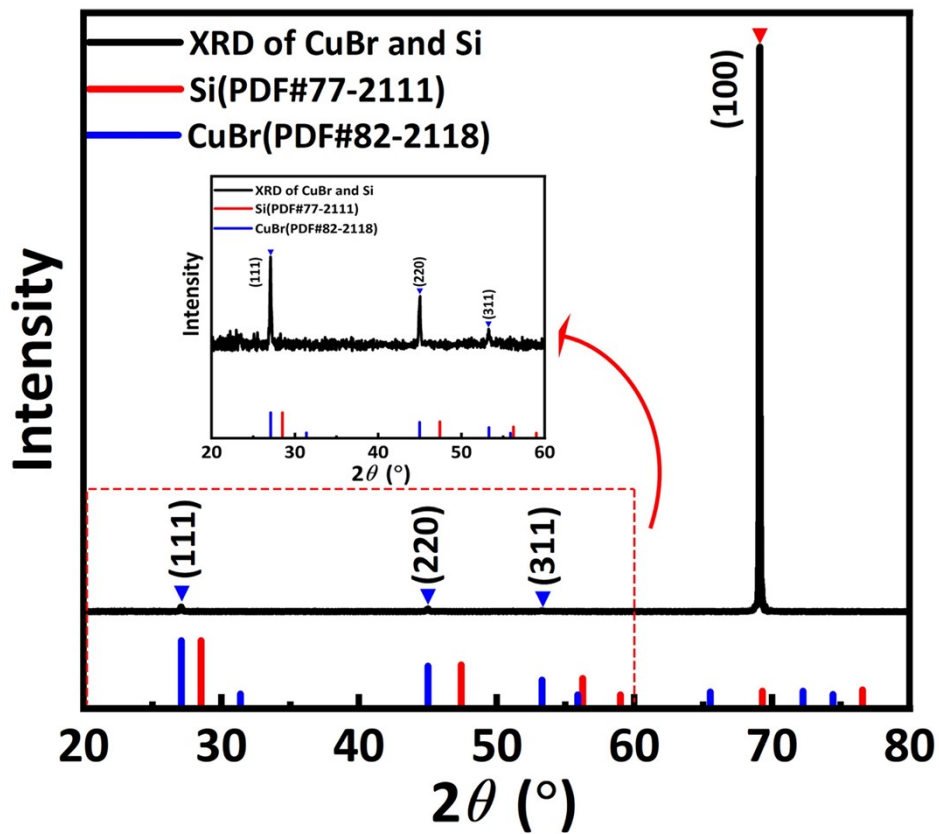

Fig. S4 XRD patterns of CuBr films with unshielded Si signals.

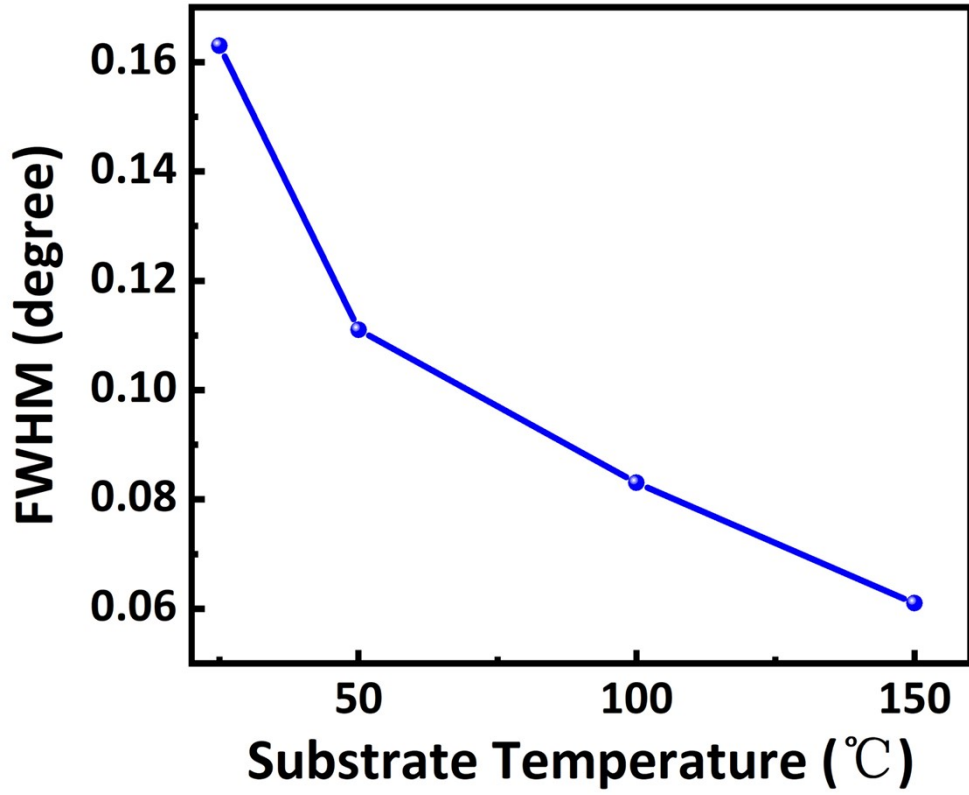

Fig. S5 the FWHM of (111) diffraction peaks at different substrate temperatures.

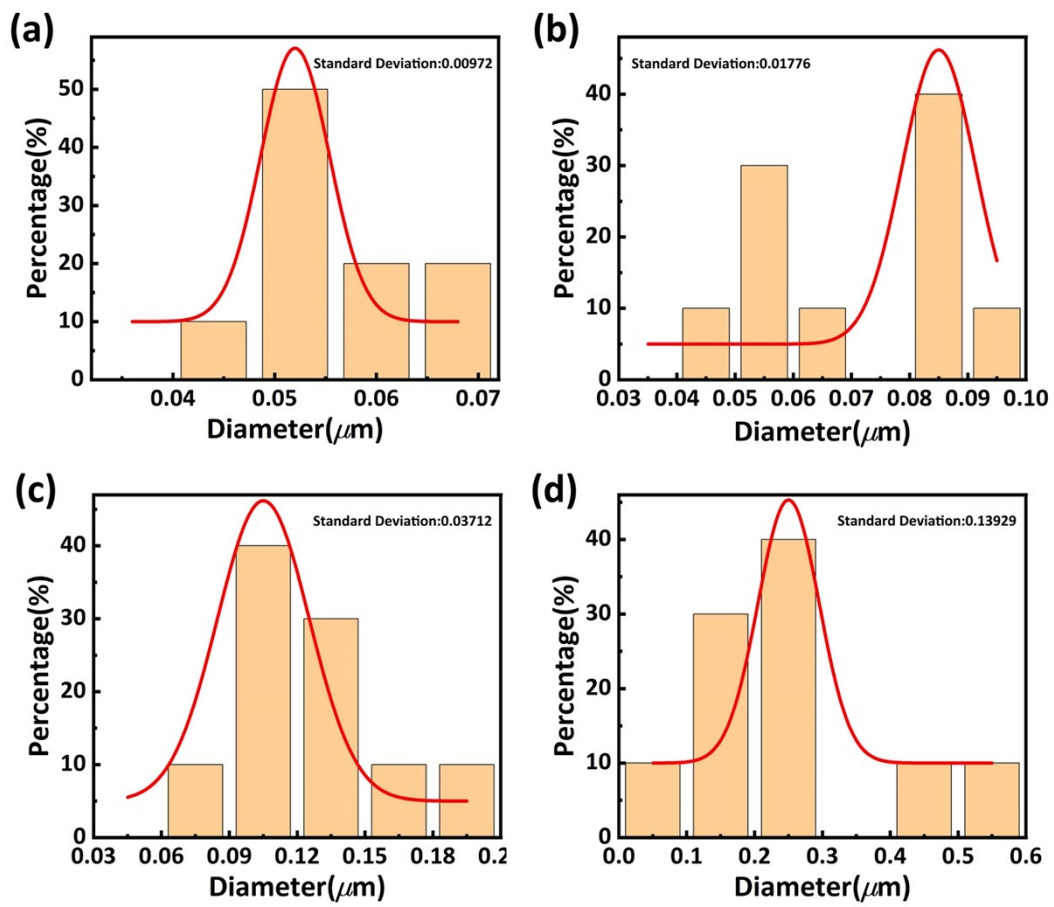

Fig. S6 Histogram of grain size at different substrate temperatures. (a)RT,(b) 50°C,(c)100°C,(d)150°C.

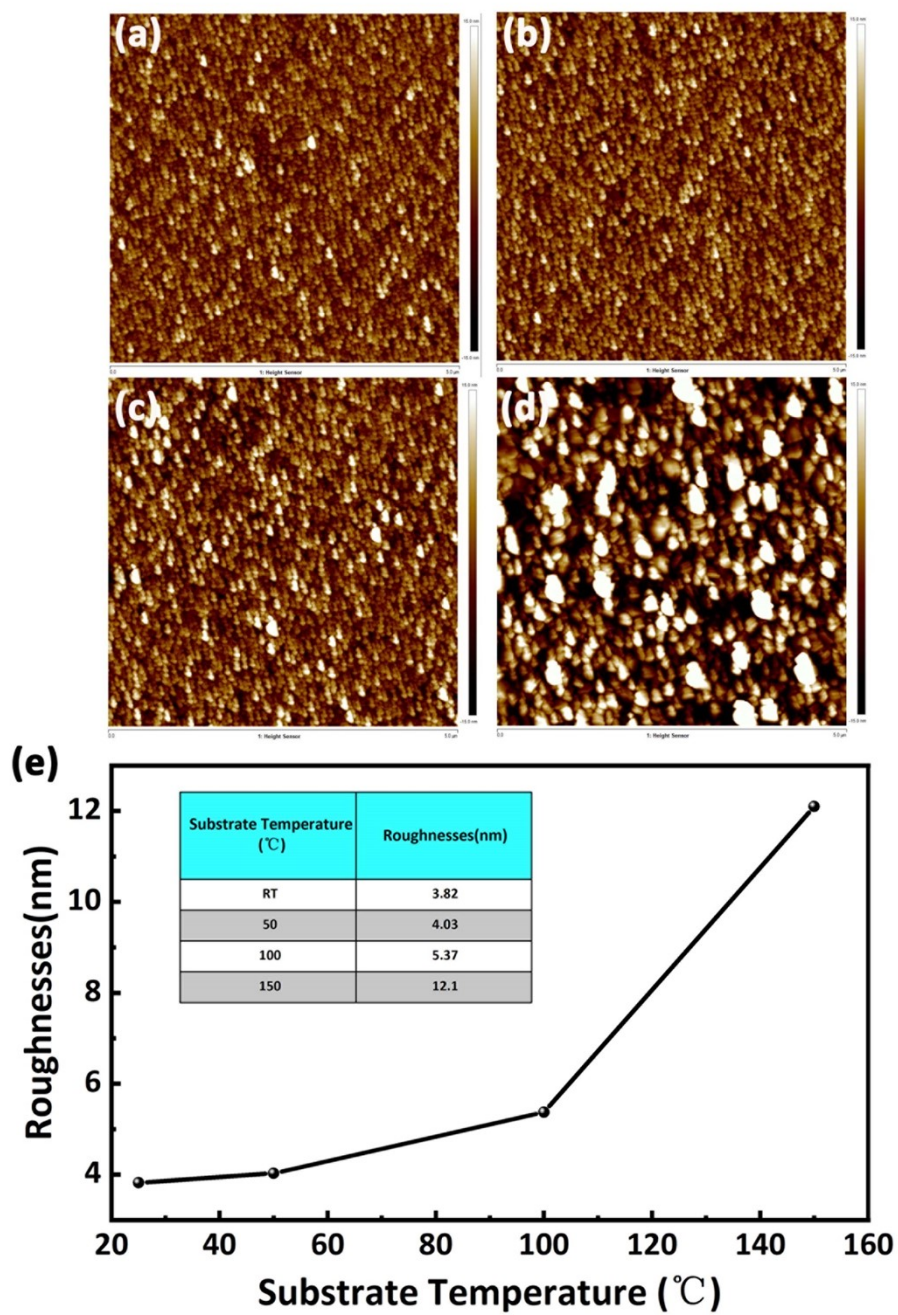

**Fig. S7** AFM images of CuBr films. (a)RT,(b) 50°C,(c)100°C,(d)150°C,(e) Roughness at different substrate temperatures.



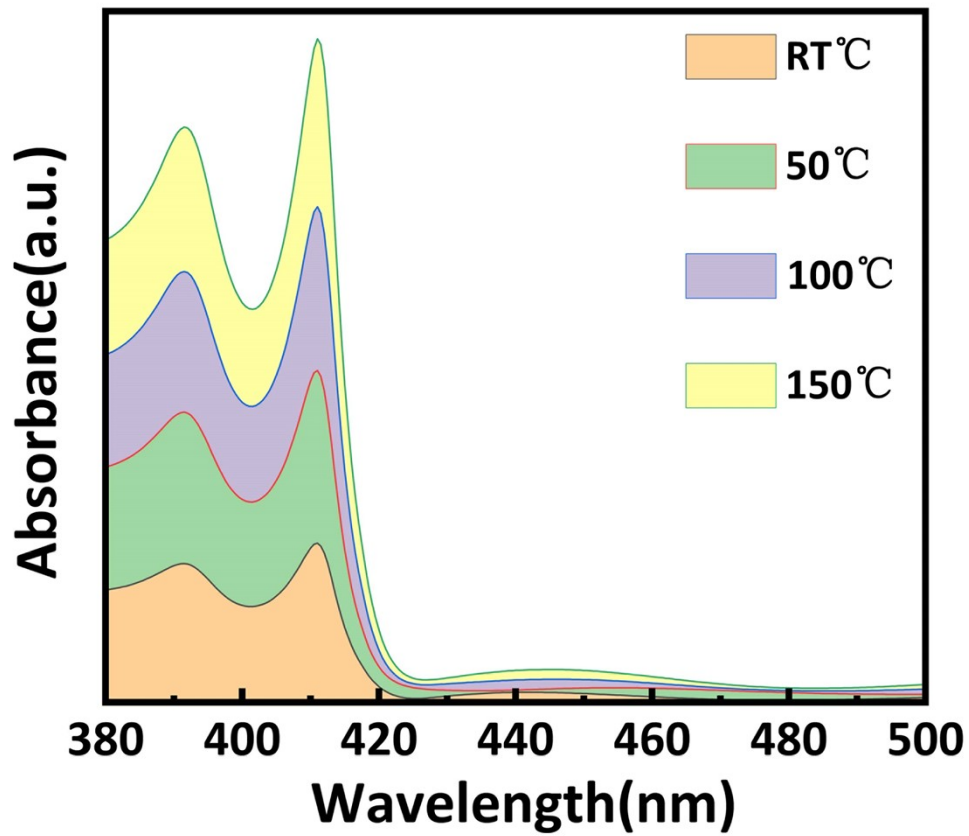

Fig. S8 Absorption spectra of CuBr thin films grown at different substrate temperatures.

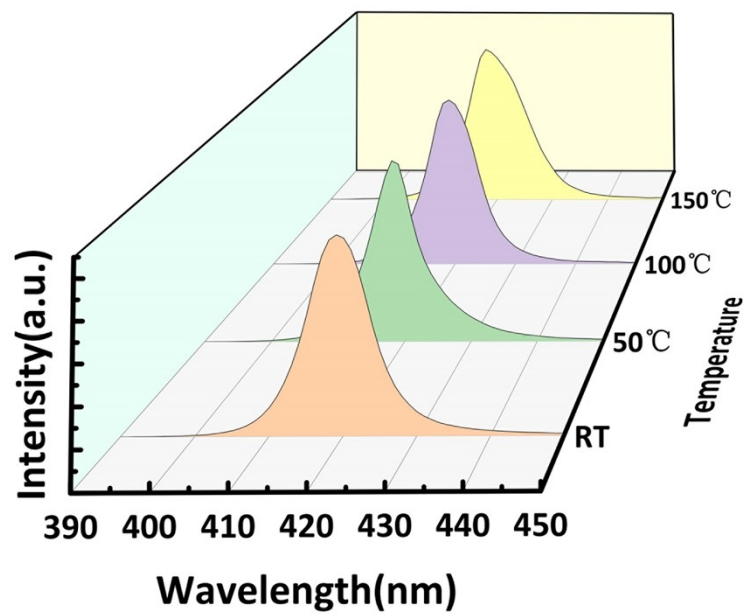

**Fig. S9** Photoluminescence spectra of CuBr film grown at different substrate temperatures.

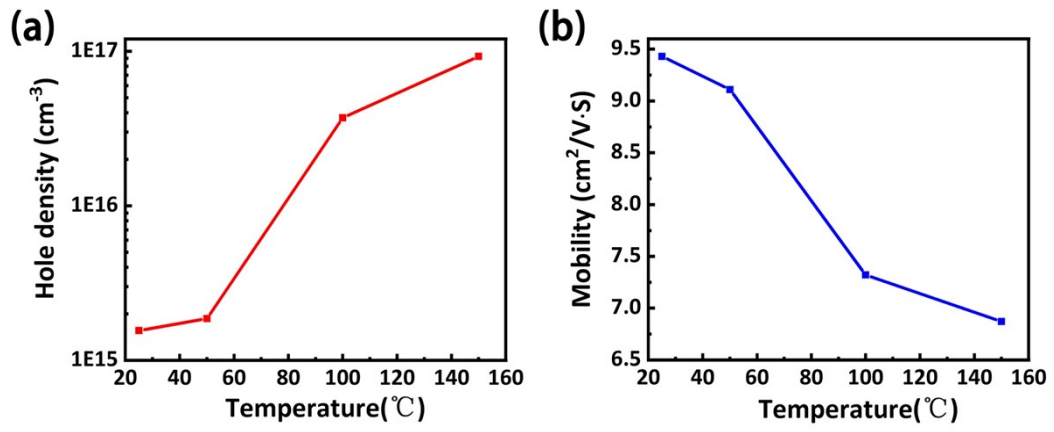

Fig. S10 CuBr at different substrate temperatures (a) hole concentration,(b) mobility.

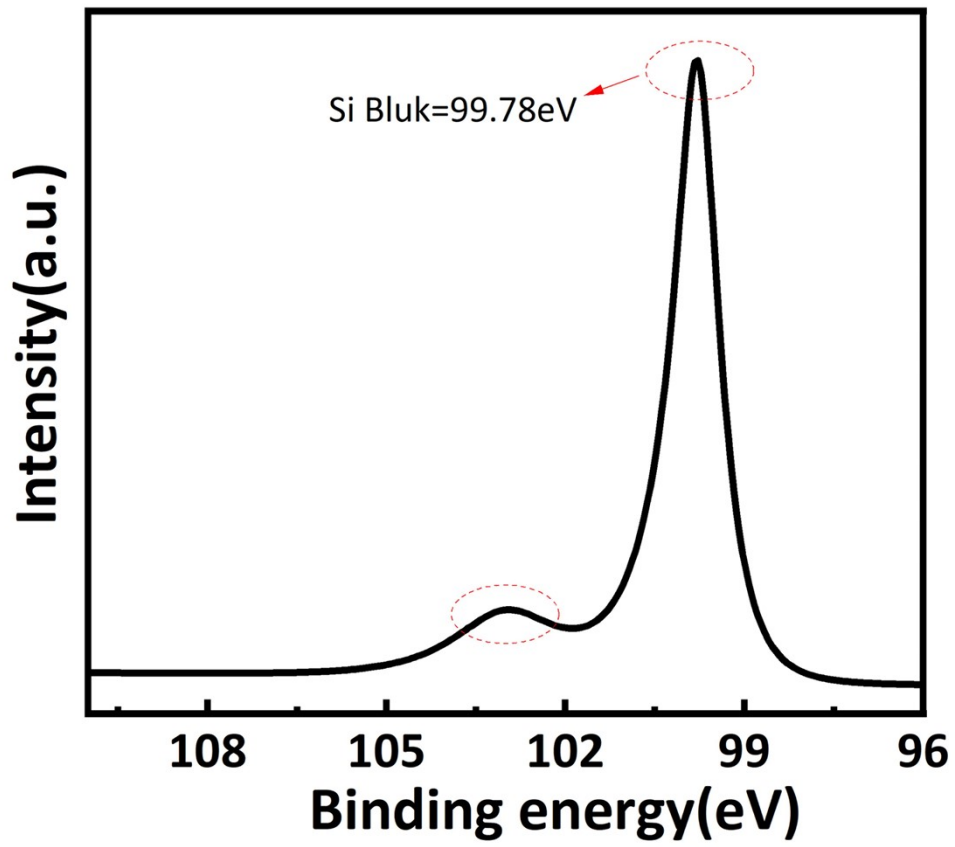

Fig. S11 Si 2p spectrum measured by XPS

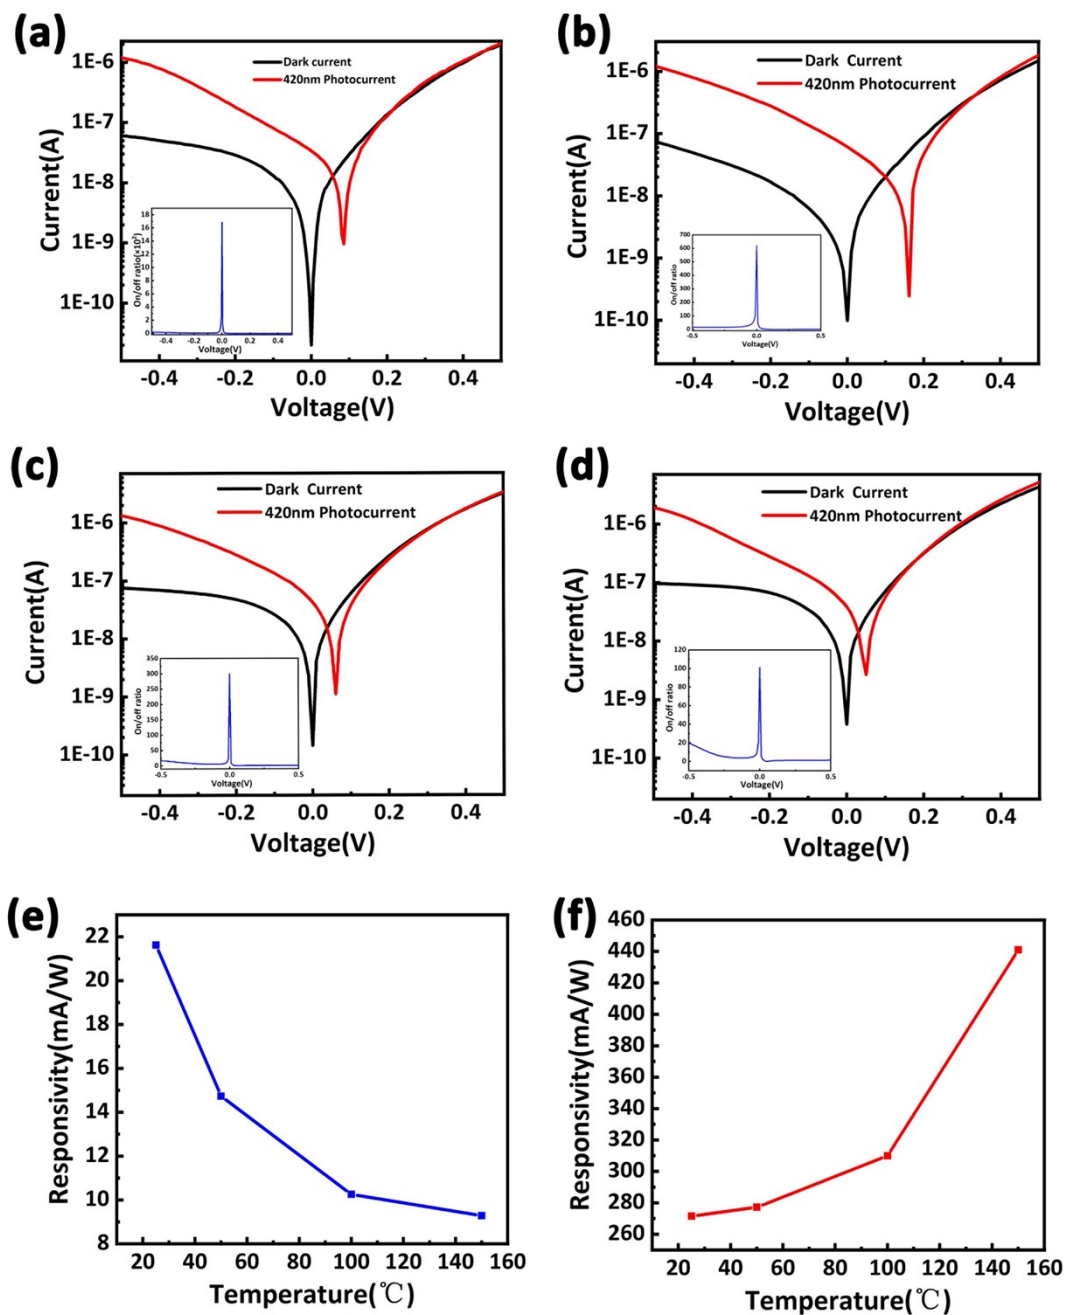

**Fig. S12** (a) light-dark current and switching ratio at RT, (b) light-dark current and switching ratio at 50 °C, (c) light-dark current and switching ratio at 100 °C, (d) light-dark current and switching ratio at 150 °C; (e) responsivity versus substrate temperature at 0V, and (f) responsivity versus substrate temperature at -0.5V

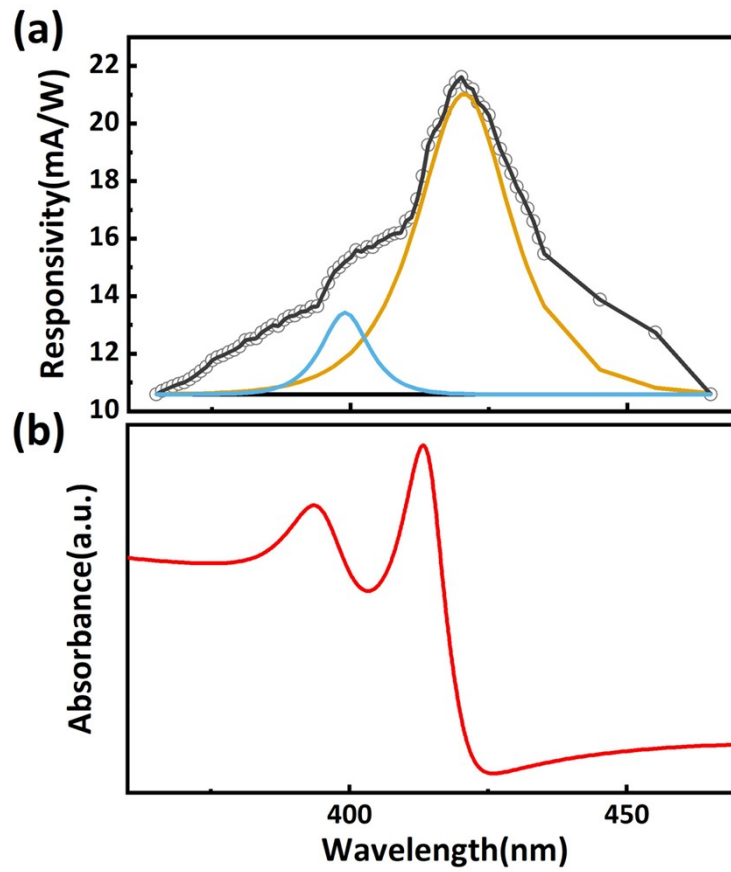

**Fig. S13** (a) Spectral responsivity of CuBr/n-Si device at zero bias voltage,(b) UV-Visible absorption spectrum of CuBr thin film deposited under RT

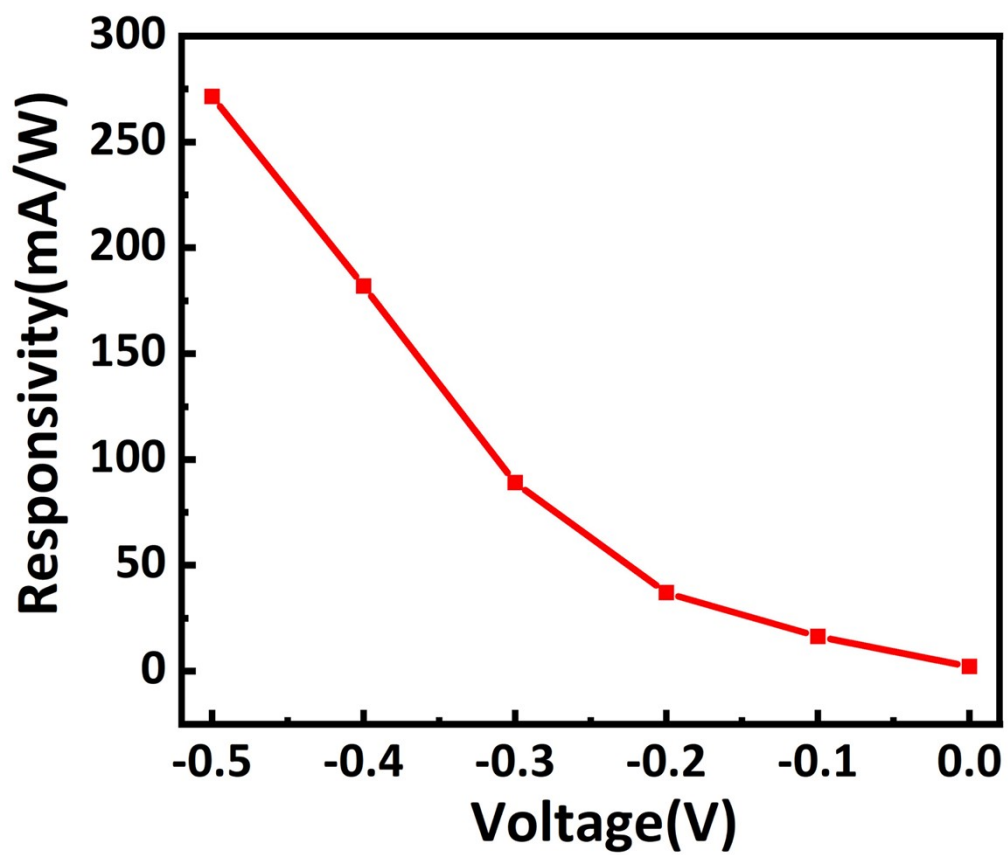

Fig. S14 Device responsiveness at different bias voltages

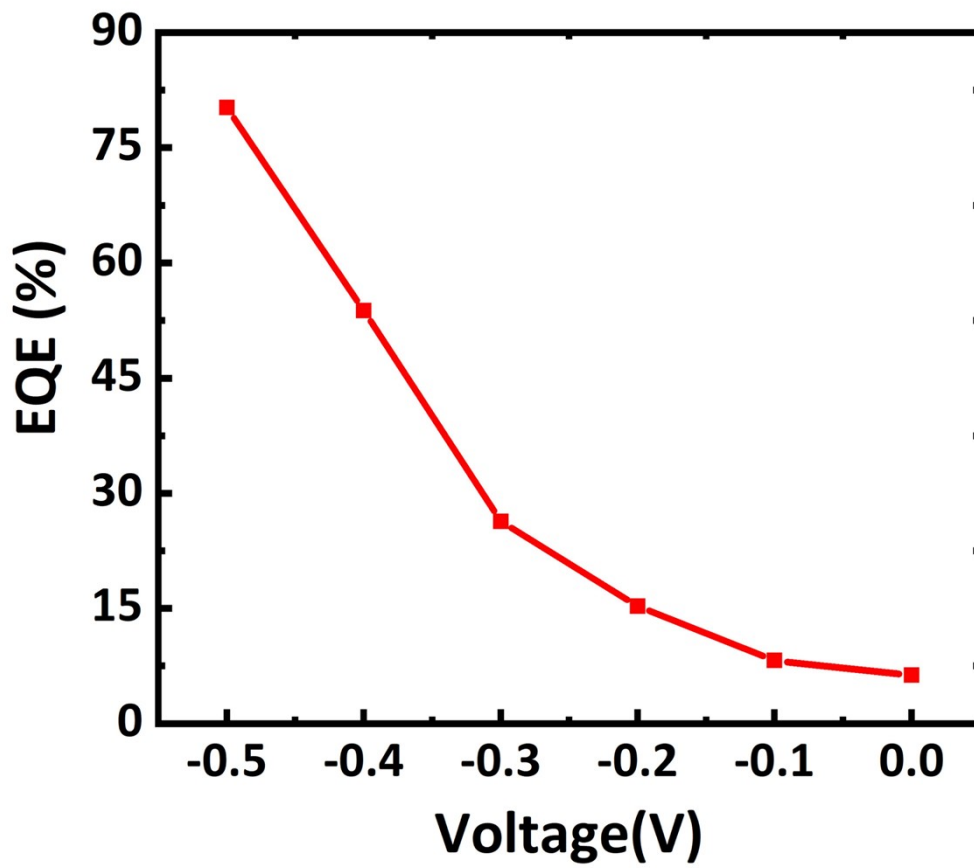

Fig. S15 EQE under different biases.



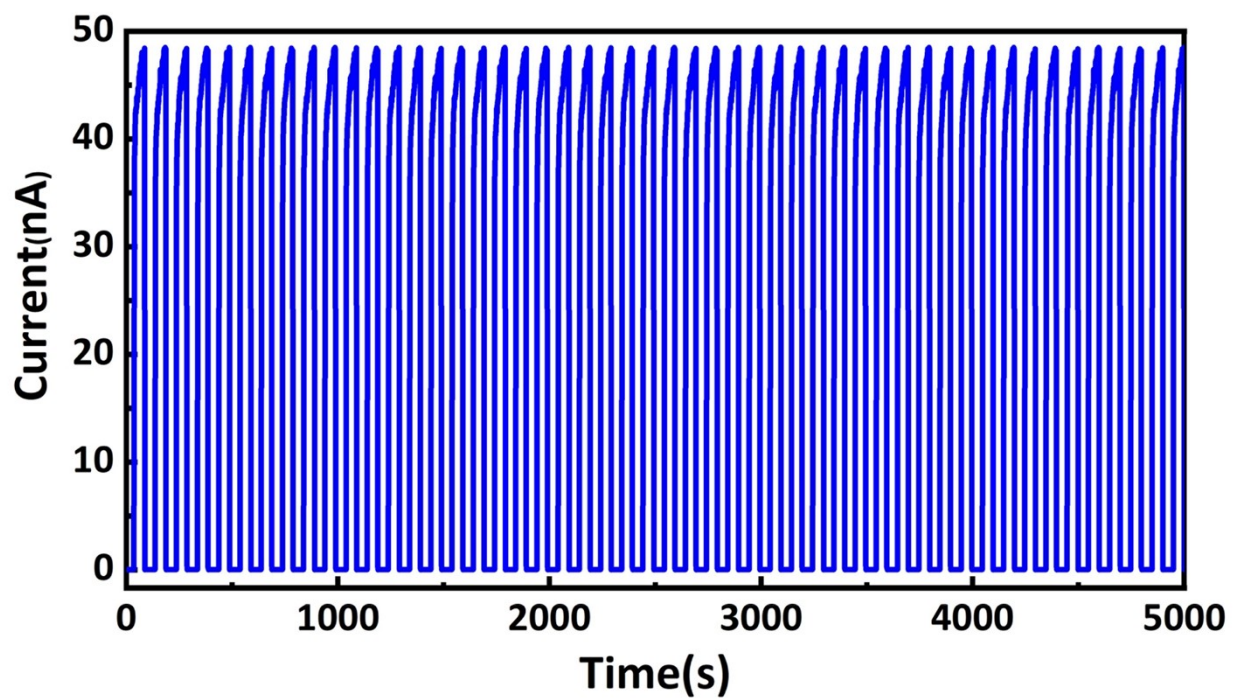

**Fig. S16** The current-time curve of the device over 50 cycles at 0V bias.

**Table. S1** Comparison of key parameters of CuBr or CuI based photodetectors

| Device structure     | Wavelength<br>h (nm) | R(A/W)            | D*<br>( $\times 10^{12}$ Jones) | Bias(V) | EQE            | On/off<br>ratio | Rise/decay<br>time(ms) | Ref.         |
|----------------------|----------------------|-------------------|---------------------------------|---------|----------------|-----------------|------------------------|--------------|
| CuBr/Ag              | 345                  | 3.17              | 0.14                            | 0       | 1126%          | —               | 48/32                  | 1            |
| CuI/ZnO              | 385                  | 0.235             | 1.23                            | -5      | —              | 5500            | 80/84                  | 2            |
| CuI/Si               | 365                  | 0.00126           | —                               | 0       | —              | 80.8@-3V        | —                      | 3            |
| CuI/GaN              | 360                  | 0.0755            | 1.27                            | 0       | —              | 2320            | 160/158                | 4            |
| ZnONRs/CuI           | 380                  | 0.08684           | —                               | 0       | -2V/<br>14388% | —               | 110/110                | 5            |
| CuI/a-IGZO           | 365                  | 0.0002~<br>0.0003 | —                               | 0       | —              | 130~350         | —                      | 6            |
| TiO <sub>2</sub> /Si | 365                  | 26                | 1.31                            | -4      | —              | —               | 0.1276/0.12<br>03      | 7            |
| CuBr/Si              | 420                  | 0.0216            | 0.53                            | 0       | 6.3%           | 1689            | 18.6/12.8              | This<br>work |

## References

1. C. Gong, J. Chu, C. Yin, C. Yan, X. Hu, S. Qian, Y. Hu, K. Hu, J. Huang and H. Wang, *Adv. Mater.*, 2019, 31, 1903580.
2. S. Niu, F. Zhao, Y. Hang, C. Wang, L. Xin, M. Zhang, M. Xu, D. Zhang, X. Chu and L. Zhang, *Optics Letters*, 2020, 45, 559-562.
3. Z. Li, L. Zhang, J. Wang, L. Yang, L. Xin, G. Li, G. Lin, S. Niu, J. Yan and F. Zhao, *Materials Research Express*, 2019, 6, 045048.
4. Z. Zhou, F. Zhao, C. Wang, X. Li, S. He, D. Tian, D. Zhang and L. Zhang, *Optics Express*, 2022, 30, 29749-29759.
5. B. Tan, G. Luo, Z. Zhang, J. Jiang, X. Guo, W. Li, J. Zhang and W. Wang, *Materials Science in Semiconductor Processing*, 2021, 134, 106008.
6. N. Yamada, Y. Kondo and R. Ino, *physica status solidi (a)*, 2019, 216, 1700782.
7. K. R. Chauhan and D. B. Patel, *Journal of Alloys and Compounds*, 2019, 792, 968-975.
